# Supplementary material for: Metagenomic assembled genomes indicated the potential application of hypersaline microbiome for plant growth promotion and stress alleviation in salinized soils
Source: PubMed Central journal article supplement (PMC10949518; doi:10.1128/msystems.01050-23), 2024-02-20
Supplement: reviewer-comments.pdf [file reviewer-comments.pdf]

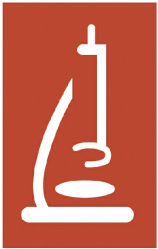

AMERICAN  
SOCIETY FOR  
MICROBIOLOGY

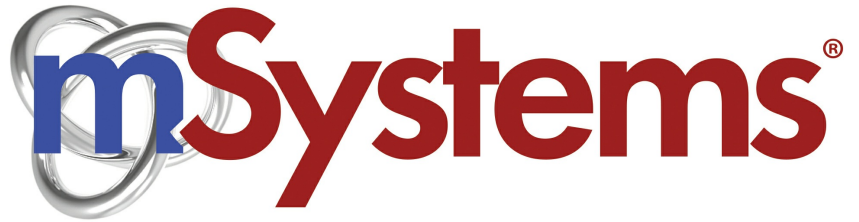

# Metagenomic assembled genomes indicated the potential application of hypersaline microbiome for plant growth promotion and stress alleviation in salinized soils

Kiran Dindhoria, Raghawendra Kumar, Bhavya Bhargava, and Rakshak Kumar

*Corresponding Author(s): Rakshak Kumar, Institute of Himalayan Bioresource Technology CSIR*

---

## Review Timeline:

|                     |                   |
|---------------------|-------------------|
| Submission Date:    | October 3, 2023   |
| Editorial Decision: | November 24, 2023 |
| Revision Received:  | January 5, 2024   |
| Accepted:           | January 19, 2024  |

---

*Editor: Rup Lal*

*Reviewer(s): Disclosure of reviewer identity is with reference to reviewer comments included in decision letter(s). The following individuals involved in review of your submission have agreed to reveal their identity: Shashi Kant Bhatia (Reviewer #1); Mukesh Kumar Awasthi (Reviewer #2)*

## Transaction Report:

(Note: With the exception of the correction of typographical or spelling errors that could be a source of ambiguity, letters and reports are not edited. The original formatting of letters and referee reports may not be reflected in this compilation.)

**DOI:** <https://doi.org/10.1128/msystems.01050-23>

Re: mSystems01050-23 (Metagenomic assembled genomes indicated the potential application of hypersaline microbiome for plant growth promotion and stress alleviation in salinized soils)

Dear Dr. Rakshak Kumar:

Thank you for the privilege of reviewing your work. Below you will find my comments, instructions from the mSystems editorial office, and the reviewer comments.

Please return the manuscript within 60 days; if you cannot complete the modification within this time period, please contact me. If you do not wish to modify the manuscript and prefer to submit it to another journal, notify me immediately so that the manuscript may be formally withdrawn from consideration by mSystems.

### Revision Guidelines

To submit your modified manuscript, log into the submission site at <https://msystems.msubmit.net/cgi-bin/main.plex>. Go to Author Tasks and click the appropriate manuscript title to begin. The information you entered when you first submitted the paper will be displayed; update this as necessary. Note the following requirements:

- Upload point-by-point responses to the issues raised by the reviewers in a file named "Response to Reviewers," NOT IN YOUR COVER LETTER
- Upload a compare copy of the manuscript (without figures) as a "Marked-Up Manuscript" file
- Upload a clean .DOC/.DOCX version of the revised manuscript and remove the previous version
- Each figure must be uploaded as a separate, editable, high-resolution file (TIFF or EPS preferred), and any multipanel figures must be assembled into one file
- Any [supplemental material](#) intended for posting by ASM should be uploaded separate from the main manuscript; you can combine all supplemental material into one file (preferred) or split it into a maximum of 10 files, with all associated legends included

For complete guidelines on revision requirements, see our [Submission and Review Process](#) webpage. Submission of a paper that does not conform to guidelines may delay acceptance of your manuscript.

**Data availability:** ASM policy requires that data be available to the public upon online posting of the article, so please verify all links to sequence records, if present, and make sure that each number retrieves the full record of the data. If a new accession number is not linked or a link is broken, provide mSystems production staff with the correct URL for the record. If the accession numbers for new data are not publicly accessible before the expected online posting of the article, publication may be delayed; please contact production staff ([mSystems@asmusa.org](mailto:mSystems@asmusa.org)) immediately with the expected release date.

**Publication Fees:** For information on publication fees and which article types are subject to charges, visit our [website](#). If your manuscript is accepted for publication and any fees apply, you will be contacted separately about payment during the production process; please follow the instructions in that e-mail. Arrangements for payment must be made before your article is published.

**ASM Membership:** Corresponding authors may [join or renew ASM membership](#) to obtain discounts on publication fees. Need to upgrade your membership level? Please contact Customer Service at [Service@asmusa.org](mailto:Service@asmusa.org).

The ASM Journals program strives for constant improvement in our submission and publication process. Please tell us how we can improve your experience by taking this quick [Author Survey](#).

Thank you for submitting your paper to mSystems.

Sincerely,  
Rup Lal  
Editor  
mSystems

Reviewer #1 (Comments for the Author):

This study provides a detailed and comprehensive analysis of metagenome-assembled genomes (MAGs) from hypersaline ecosystems, shedding light on the microbial communities and their functional potential in these environments. The research appears to be well-structured, presenting results, methods, and discussion in a logical sequence. The high-quality

sequencing data, bioinformatic analysis, and functional annotation of MAGs offer valuable insights into the adaptation strategies and plant growth potential of microorganisms in hypersaline ecosystems. However, there are some suggestions from my side to improve this manuscript further:

1. In the introduction, consider providing an overview of the importance and ecological relevance of hypersaline ecosystems rather than saline soils. Why are hypersaline ecosystems significant, and what are the key challenges microorganisms face in such environments?
2. The taxonomic classification indicated that the majority of the recovered MAGs were affiliated with Archaea. Authors may include the ecological roles played by these Archaea in hypersaline ecosystems, and how do they interact with other microorganisms in these environments under discussion section?
3. Authors may also calculate bin coverage in order to get better idea of microbial prevalence.
4. In the discussion section, consider providing more context and references to support your findings. This can help readers better understand the significance of your results in the broader context of hypersaline ecosystems and microbial ecology.
5. The authors should pay attention to language and grammatical errors in the manuscript to enhance its readability and clarity.

Reviewer #2 (Comments for the Author):

This study provides a comprehensive analysis of metagenome-assembled genomes (MAGs) from hypersaline ecosystems, yielding valuable insights into microbial community composition and functional capabilities. The study elucidates the adaptive strategies of microorganisms in hypersaline environments, with a specific focus on their potential to support plant growth.

However, there are some comments to enhance the manuscript from my side:

The introduction should be more focused with proper citations of other related studies from hypersaline ecosystems.

The metagenome assembly in present study has been carried out independently using three different assembly tools. The authors should clearly state the parameters for bin quality in discussion. The information regarding the total number of genes, ORFs, and hypothetical genes can also be added.

The details of the genes observed should be added in the form of the table either in main text or in supplementary.

Authors can discuss the functional role of the observed taxa in context of the hypersaline ecosystems.

Authors should focus on improving the language of the manuscript.

This study provides a comprehensive analysis of metagenome-assembled genomes (MAGs) from hypersaline ecosystems, yielding valuable insights into microbial community composition and functional capabilities. The study elucidates the adaptive strategies of microorganisms in hypersaline environments, with a specific focus on their potential to support plant growth. However, there are some comments to enhance the manuscript from my side:

The introduction should be more focused with proper citations of other related studies from hypersaline ecosystems.

The metagenome assembly in present study has been carried out independently using three different assembly tools. The authors should clearly state the parameters for bin quality in discussion. The information regarding the total number of genes, ORFs, and hypothetical genes can also be added.

The details of the genes observed should be added in the form of the table either in main text or in supplementary.

Authors can discuss the functional role of the observed taxa in context of the hypersaline ecosystems.

Authors should focus on improving the language of the manuscript.

**Reviewer #1 (Comments for the Author):**

This study provides a detailed and comprehensive analysis of metagenome-assembled genomes (MAGs) from hypersaline ecosystems, shedding light on the microbial communities and their functional potential in these environments. The research appears to be well-structured, presenting results, methods, and discussion in a logical sequence. The high-quality sequencing data, bioinformatic analysis, and functional annotation of MAGs offer valuable insights into the adaptation strategies and plant growth potential of microorganisms in hypersaline ecosystems. However, there are some suggestions from my side to improve this manuscript further:

**Comment 1:** In the introduction, consider providing an overview of the importance and ecological relevance of hypersaline ecosystems rather than saline soils. Why are hypersaline ecosystems significant, and what are the key challenges microorganisms face in such environments?

**Response 1:** Thank you for bringing this to our notice. Upon your suggestion, the overview of the importance and ecological relevance of hypersaline ecosystems and their key challenges have been incorporated in the introduction section of the manuscript as follows:

“Hypersaline environments are..... plant growth promotion.”

**Comment 2:** The taxonomic classification indicated that the majority of the recovered MAGs were affiliated with Archaea. Authors may include the ecological roles played by these Archaea in hypersaline ecosystems, and how do they interact with other microorganisms in these environments under discussion section?

**Response 2:** Thanks for your suggestion. The ecological roles of the MAGs affiliated with Archaea and their interactions with other microbes are now incorporated in a paragraph under discussion section as follows:

“On the other hand, among Archaea ..... anaerobic carboxydrotrophy.”

**Comment 3:** Authors may also calculate bin coverage in order to get better idea of microbial prevalence.

**Response 3:** Thanks for your valuable suggestion. We have now calculated the coverage of each bin in both samples and incorporated the table in the supplementary information as Table S1. We have also cited the table at relevant positions in the manuscript.

**Comment 4:** In the discussion section, consider providing more context and references to support your findings. This can help readers better understand the significance of your results in the broader context of hypersaline ecosystems and microbial ecology.

**Response 4:** Thank you for pointing this out. Upon your suggestion, we have incorporated new references to support our findings as follows:

“In a study conducted by Wang et al., in 2020..... with the available literature.”

“Zhao et al., in 2020, also found .....the Euryarcheota phylum”

“In a previous analysis by Sun et al., in 2022.....salt-tolerant approaches.”

“Some of the earlier ..... highly saline habitats (Rathore et al., 2021).”

**Comment 5:** The authors should pay attention to language and grammatical errors in the manuscript to enhance its readability and clarity.

**Response 5:** Thank you for the valuable suggestion. The Premium version of the Grammarly software is implemented to make corrections to the revised manuscript.

**Reviewer #2 (Comments for the Author):**

This study provides a comprehensive analysis of metagenome-assembled genomes (MAGs) from hypersaline ecosystems, yielding valuable insights into microbial community composition and functional capabilities. The study elucidates the adaptive strategies of microorganisms in hypersaline environments, with a specific focus on their potential to support plant growth. However, there are some comments to enhance the manuscript from my side:

**Comment 1:** The introduction should be more focused with proper citations of other related studies from hypersaline ecosystems.

**Response 1:** Thank you for bringing this to our notice. We have now included the citations of recent studies from hypersaline ecosystems in a paragraph under introduction section as shown below:

“There are several reports..... numerous studies (Dindhoria et al., 2023a; Liu et al., 2023).”

**Comment 2:** The metagenome assembly in present study has been carried out independently using three different assembly tools. The authors should clearly state the parameters for bin quality in discussion. The information regarding the total number of genes, ORFs, and hypothetical genes can also be added.

**Response 2:** The parameters used for assigning the bin quality are now incorporated in the results and discussion sections. The information regarding genes such as CDS, hypothetical genes and tRNAs of the selected MAGs is now added in the supplementary sheet as Table S2- S4. The information regarding parameters used for assigning the bin quality is incorporated as follows:

Result section:

“MAGs meeting the criteria of ..... outlined by Bowers et al., in 2017.”

Discussion section:

“It indicated the recovery of MAGs .....standard developed by the Genomic Standards Consortium (Bowers et al., 2017).”

**Comment 3:** The details of the genes observed should be added in the form of the table either in main text or in supplementary.

**Response 3:** Thank you for pointing this out. We have now added a table containing all the observed genes in all MAGs in the supplementary information as Table S5.

**Comment 4:** Authors can discuss the functional role of the observed taxa in context of the hypersaline ecosystems.

**Response 4:** Thanks for your suggestion. The functional roles of the observed taxa have now been added to the discussion section as follows:

“The genus *Pseudomonas*.....anaerobic carboxydofrophy.”

**Comment 5:** Authors should focus on improving the language of the manuscript.

**Response 5:** Thank you for the valuable suggestion. The Premium version of the Grammarly software is implemented to make corrections to the revised manuscript.

Re: mSystems01050-23R1 (Metagenomic assembled genomes indicated the potential application of hypersaline microbiome for plant growth promotion and stress alleviation in salinized soils)

Dear Dr. Rakshak Kumar:

Your manuscript has been accepted, and I am forwarding it to the ASM production staff for publication. Your paper will first be checked to make sure all elements meet the technical requirements. ASM staff will contact you if anything needs to be revised before copyediting and production can begin. Otherwise, you will be notified when your proofs are ready to be viewed.

**Data Availability:** ASM policy requires that data be available to the public upon online posting of the article, so please verify all links to sequence records, if present, and make sure that each number retrieves the full record of the data. If a new accession number is not linked or a link is broken, provide production staff with the correct URL for the record. If the accession numbers for new data are not publicly accessible before the expected online posting of the article, publication may be delayed; please contact ASM production staff immediately with the expected release date.

**Publication Fees:** For information on publication fees and which article types have charges, please visit our [website](#). We have partnered with Copyright Clearance Center (CCC) to collect author charges. If fees apply to your paper, you will receive a message from no-reply@copyright.com with further instructions. For questions related to paying charges through RightsLink, please contact CCC at ASM\_Support@copyright.com or toll free at +1-877-622-5543. CCC makes every attempt to respond to all emails within 24 hours.

**ASM Membership:** Corresponding authors may [join or renew ASM membership](#) to obtain discounts on publication fees. Need to upgrade your membership level? Please contact Customer Service at Service@asmusa.org.

**PubMed Central:** ASM deposits all mSystems articles in PubMed Central and international PubMed Central-like repositories immediately after publication. Thus, your article is automatically in compliance with the NIH access mandate. If your work was supported by a funding agency that has public access requirements like those of the NIH (e.g., the Wellcome Trust), you may post your article in a similar public access site, but we ask that you specify that the release date be no earlier than the date of publication on the mSystems website.

**Embargo Policy:** A press release may be issued as soon as the manuscript is posted on the [mSystems Latest Articles webpage](#). The corresponding author will receive an email with the subject line "ASM Journals Author Services Notification" when the article is available online.

**Featured Image Submissions:** If you would like to submit a potential Featured Image, please email a file and a short legend to msystems@asmusa.org. Please note that we can only consider images that (i) the authors created or own and (ii) have not been previously published. By submitting, you agree that the image can be used under the same terms as the published article. Image File requirements: TIF/EPS, 7.5 inches wide by 8.25 inches tall (at least 2,250 pixels wide by 2,475 pixels tall), minimum 300 dpi resolution (600 dpi preferred), RGB, and no figure elements, e.g., arrows or panel labels. The legend should be a short description of the image, 1-2 sentences recommended.

**Author Video:** For mSystems research articles, you are welcome to submit a short author video for your recently accepted paper. Videos are normally 1 minute long and are a great opportunity for junior authors to get greater exposure. Importantly, this video will not hold up the publication of your paper and you can submit it at any time.

Details of the video are:

- Minimum resolution of 1280 x 720
- .mov or .mp4 video format
- Provide video in the highest quality possible but do not exceed 1080p
- Provide a still/profile picture that is 640 (w) x 720 (h) max
- Provide the script that was used

We recognize that the video files can become quite large, so to avoid quality loss ASM suggests sending the video file via <https://www.wetransfer.com/>. When you have a final version of the video and the still ready to share, please send it to mSystems staff at msystems@asmusa.org.

Thank you for submitting your paper to mSystems.

Sincerely,  
Rup Lal



Editor  
mSystems

Reviewer #1 (Comments for the Author):

The authors have revised the manuscript well according to all the reviewer's comments.

Reviewer #2 (Comments for the Author):

Please accept in present form because authors have properly addressed all the comments.
